# Supplementary material for: Destabilization potential of phenolics on Aβ fibrils: mechanistic insights from molecular dynamics simulation
Source: Royal Society of Chemistry journal article supplement (doi:10.1039/d0cp02459g), 2020-01-01
Supplement: d0cp02459g2.pdf [file d0cp02459g2.pdf]

## Supporting Information

### **Destabilization Potential of Phenolics on A $\beta$ Fibril: Mechanistic Insights from Molecular Dynamics Simulations**

Shivani Gupta<sup>1</sup> and Ashok Kumar Dasmahapatra<sup>1,2\*</sup>

<sup>1</sup>Department of Chemical Engineering and <sup>2</sup>Center for Nanotechnology, Indian Institute of  
Technology Guwahati, Guwahati - 781039, Assam, India.

---

\* Corresponding author: Phone: +91-361-258-2273; Fax: +91-361-258-2291; Email address: [akdm@iitg.ac.in](mailto:akdm@iitg.ac.in)

**Fig. S1. Final configuration of A $\beta$  with (a) water, (b) DHC, (c) EGT, and (d) GDE.**

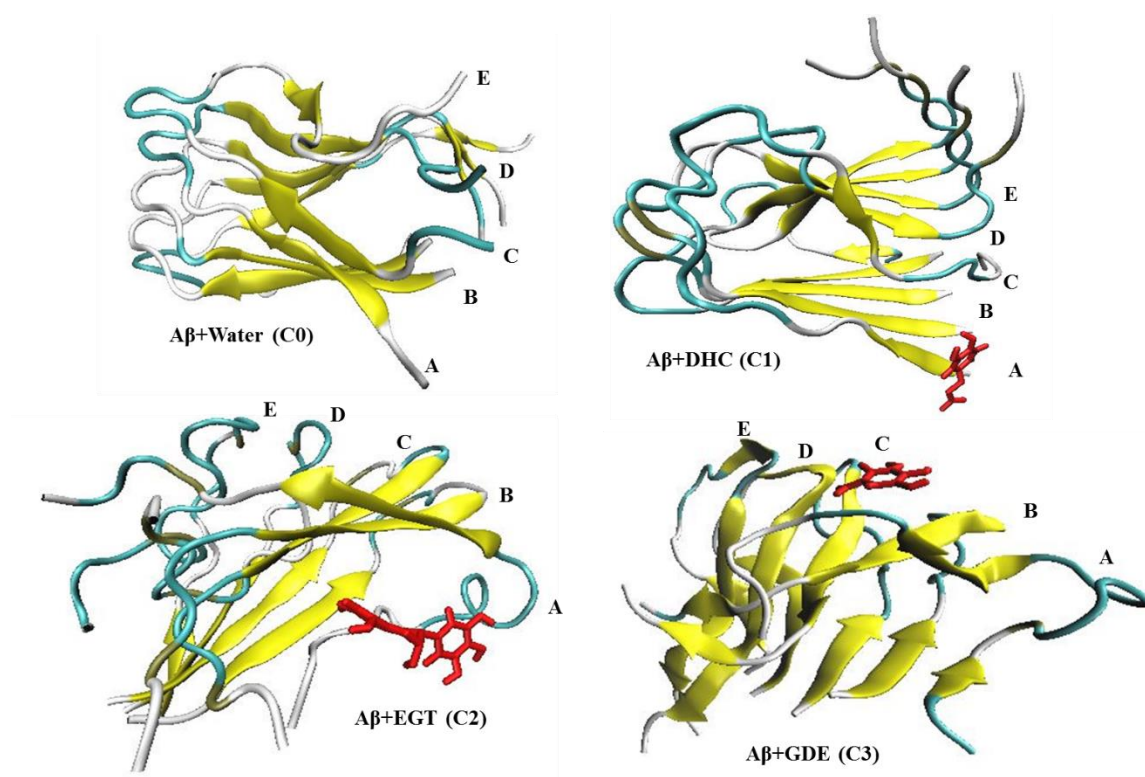

Fig. S2. (a) Average K28 C $\alpha$  distance of chain D-E in water and all 4 ligands, and (b) Average D23-K28 distance of 2BEG in water and all 4 ligands.

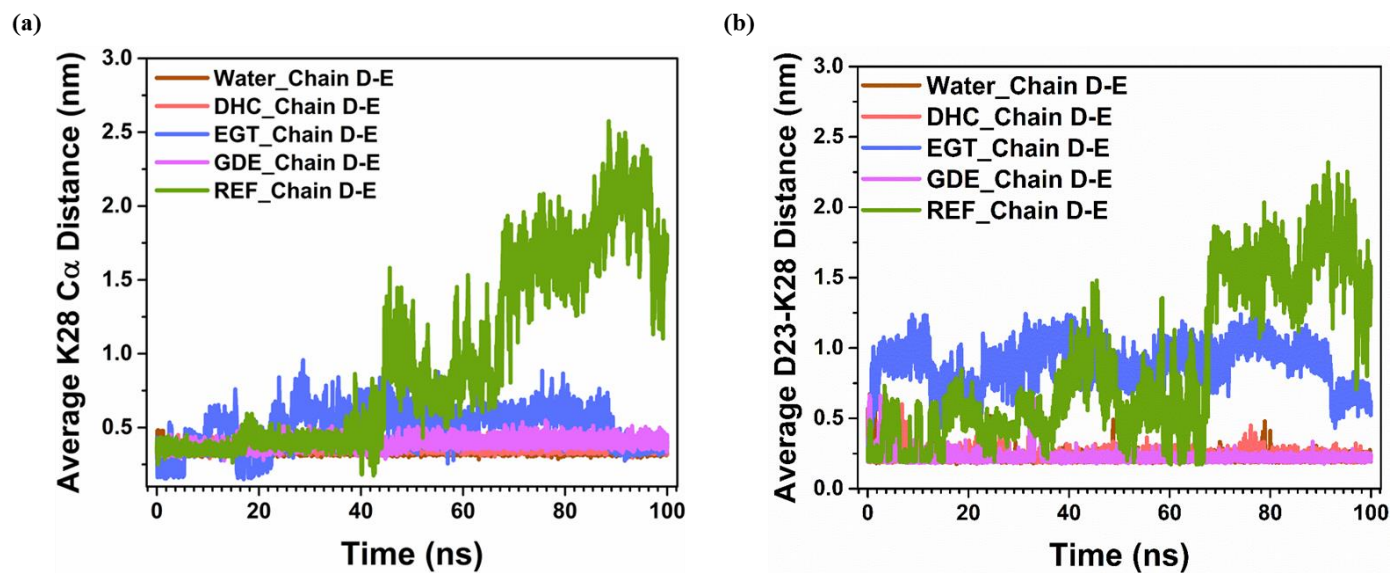

**Fig. S3. Correlation between the theoretical and experimental NMR chemical shifts for  $C\alpha$  and  $C\beta$  atoms of  $A\beta_{42}$  protofibril structure is shown in panel (a), and (b), respectively. The unit of NMR chemical shift is in ppm.**

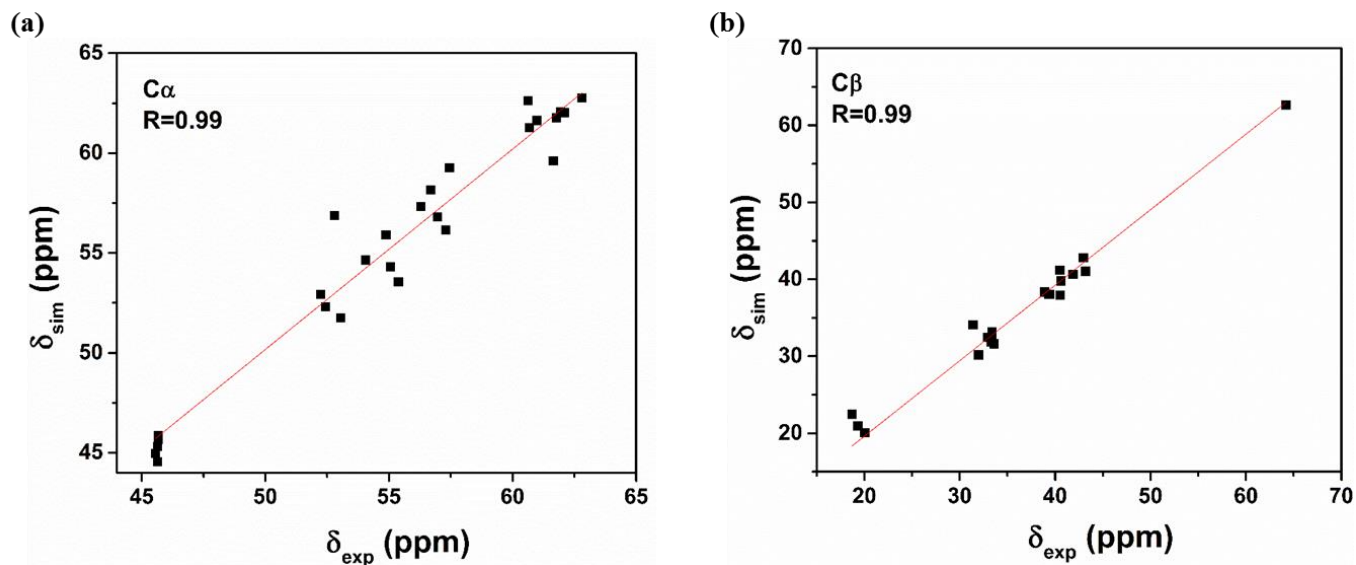

**Fig. S4. Destabilization of A $\beta$  fibril on addition of Ellagic acid by Average D23-K28 distance for all neighboring chains collectively A $\beta$ -water and A $\beta$ -REF system.**

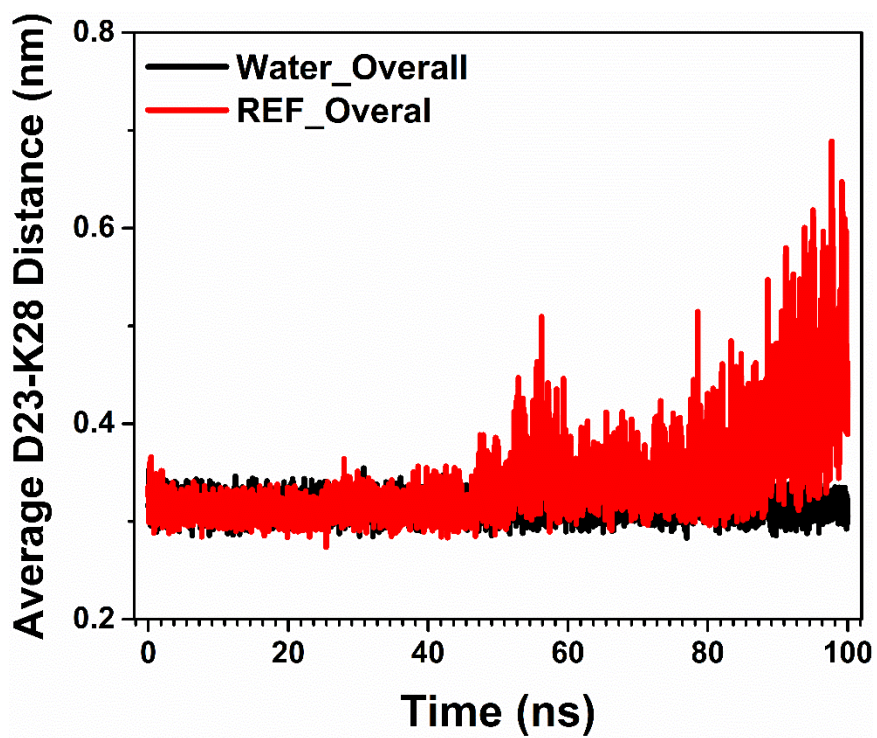

Fig. S5. Average D23-K28 distance for A $\beta$ -water and A $\beta$ -REF system (a) Within Chain A, and (b) Within Chain E.

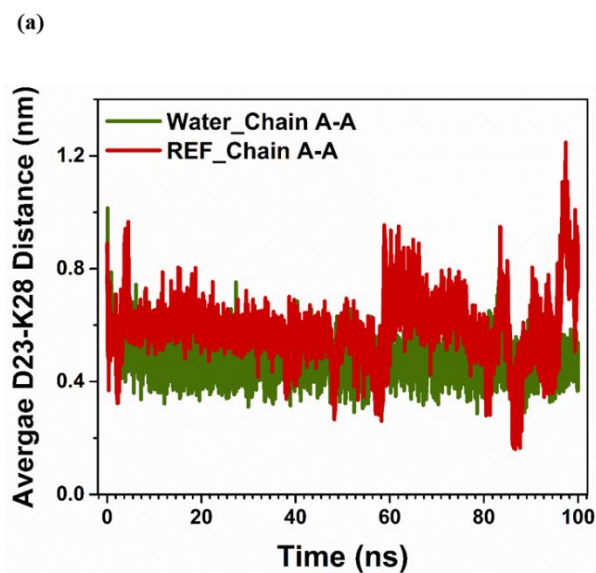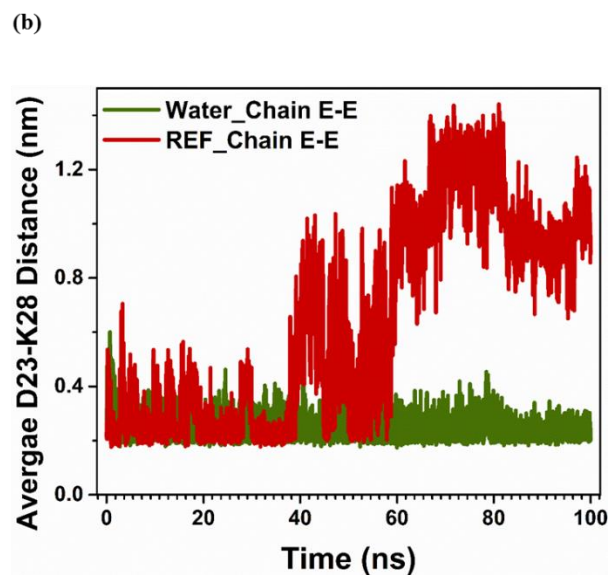

**Fig. S6. Individual residue contribution to the total binding energy expressed in kcal/mol (a)- for the entire A $\beta$  Fibril and (b)- Key residues which contribute the most to binding of DHC with chain A are indicated with a label in Orange.**

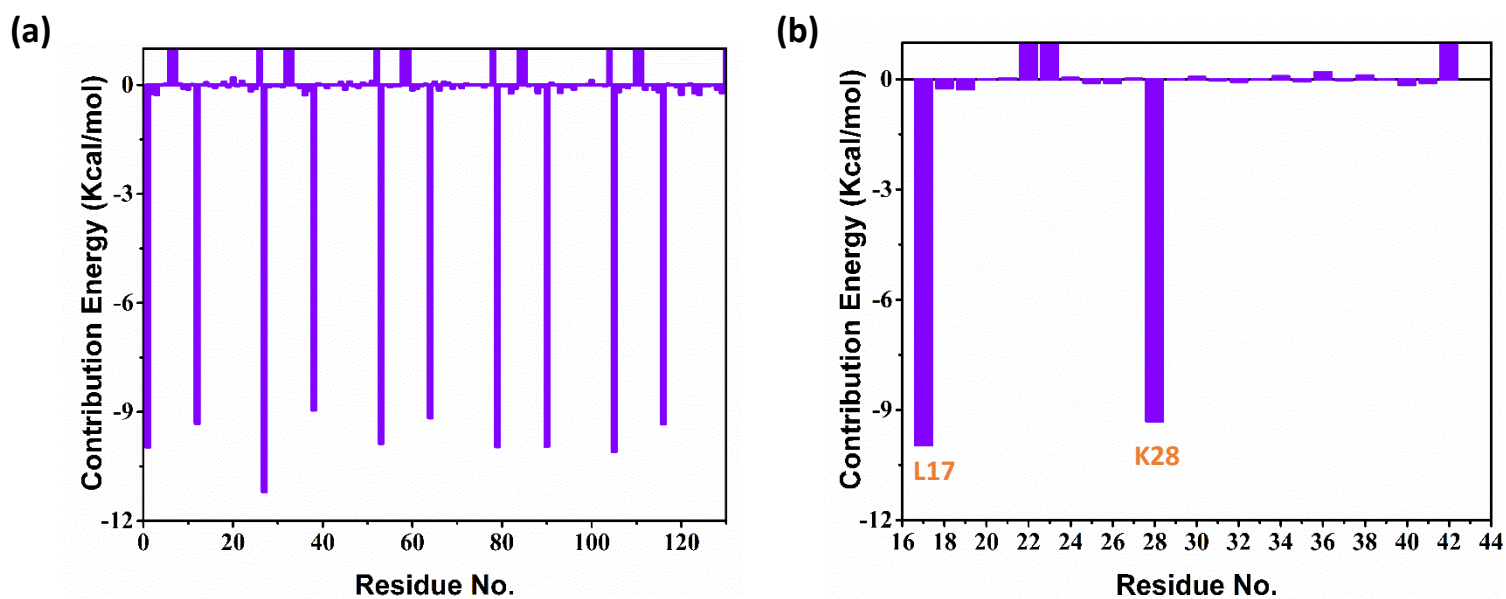

**Fig. S7. Individual residue contribution to the total binding energy expressed in kcal/mol (a)- for the entire A $\beta$  Fibril and (b)- Key residues which contribute the most to binding of EGT with chain A are indicated with a label in Orange.**

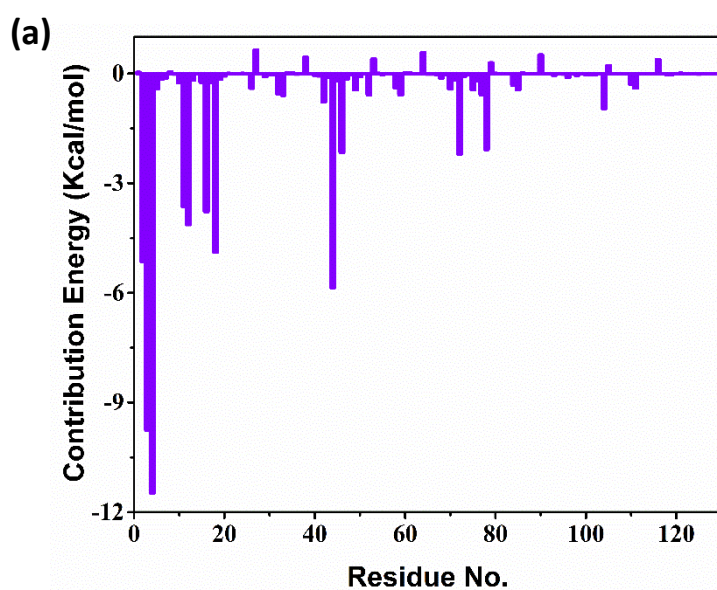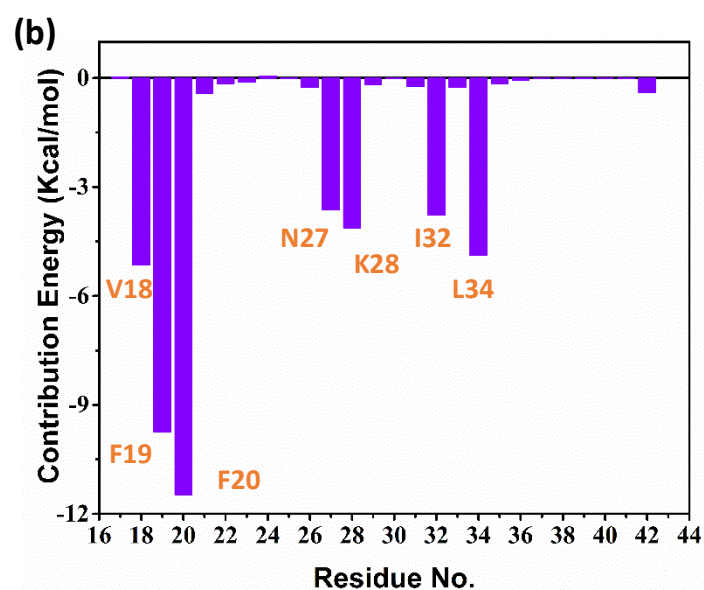



**Fig. S8. Individual residue contribution to the total binding energy expressed in kcal/mol (a)- for the entire A $\beta$  Fibril and (b)- Key residues which contribute the most to binding of GDE with chain A are indicated with a label in Orange.**

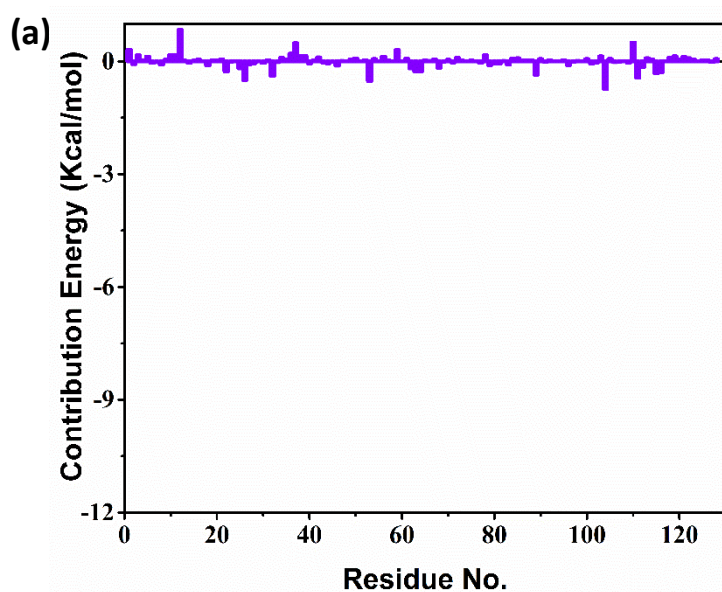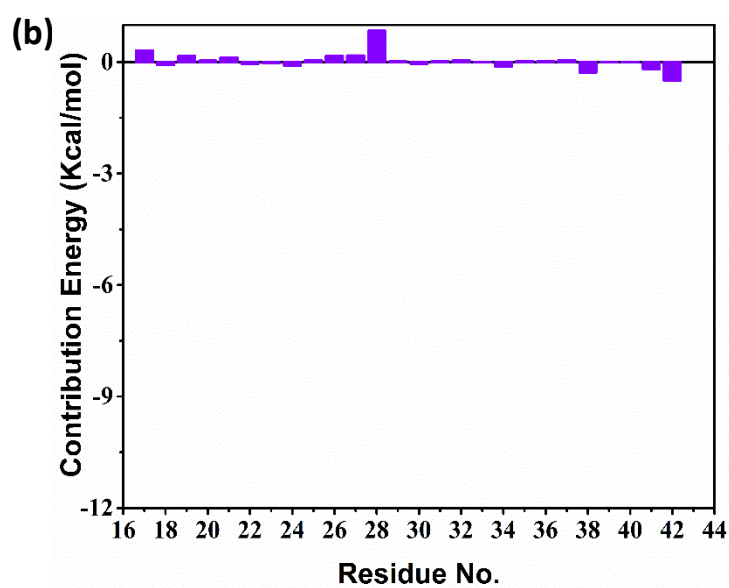

**Table S1. Inter-chain binding free energy (Kcal/mol) for chain D and E for system A $\beta$ -Water and A $\beta$ -REF complex evaluated by MMPBSA method.**

| <b>Energy Terms</b>    | <b>Inter-chain (chain D and E) binding energy for A<math>\beta</math>-Water (Kcal/mol)</b> | <b>Inter-chain (chain D and E) binding energy for A<math>\beta</math>-REF (Kcal/mol)</b> |
|------------------------|--------------------------------------------------------------------------------------------|------------------------------------------------------------------------------------------|
| $\Delta E_{vdW}$       | -333.26 $\pm$ 2.03                                                                         | -195.63 $\pm$ 1.83                                                                       |
| $\Delta E_{elec}$      | -272.51 $\pm$ 1.48                                                                         | -81.05 $\pm$ 2.55                                                                        |
| $\Delta E_{MM}^a$      | -605.77 $\pm$ 3.51                                                                         | -276.68 $\pm$ 4.38                                                                       |
| $\Delta G_{ps}$        | 443.99 $\pm$ 1.38                                                                          | 198.10 $\pm$ 0.00                                                                        |
| $\Delta G_{nps}$       | -40.84 $\pm$ 0.84                                                                          | -23.92 $\pm$ 0.77                                                                        |
| $\Delta G_{solv}^b$    | 403.15 $\pm$ 2.22                                                                          | 174.18 $\pm$ 0.77                                                                        |
| $\Delta G_{binding}^c$ | -202.62 $\pm$ 5.73                                                                         | -102.50 $\pm$ 5.15                                                                       |

$$^a \Delta E_{MM} = \Delta E_{vdW} + \Delta E_{elec}$$

$$^b \Delta G_{solv} = \Delta G_{ps} + \Delta G_{nps}$$

$$^c \Delta G_{binding} = \Delta E_{MM} + \Delta G_{solv}$$
