# Supplementary figures and images for: Destabilization potential of phenolics on Aβ fibrils: mechanistic insights from molecular dynamics simulation
Source: Royal Society of Chemistry journal article supplement (doi:10.1039/d0cp02459g), 2020-01-01

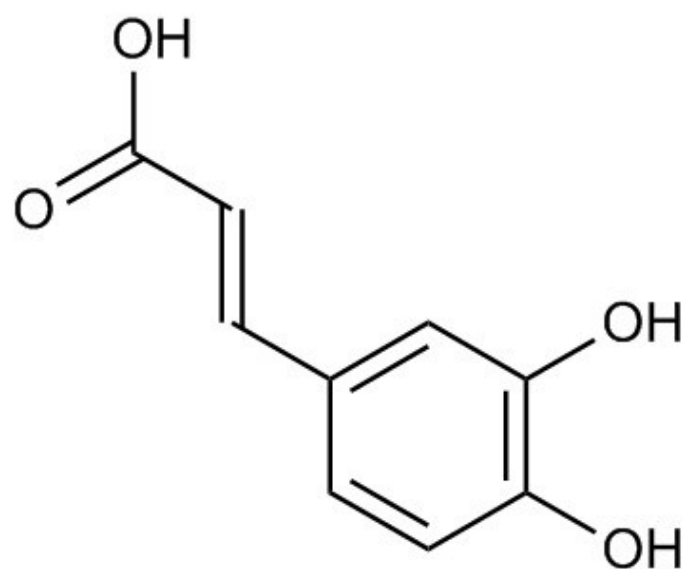

Caffeic Acid

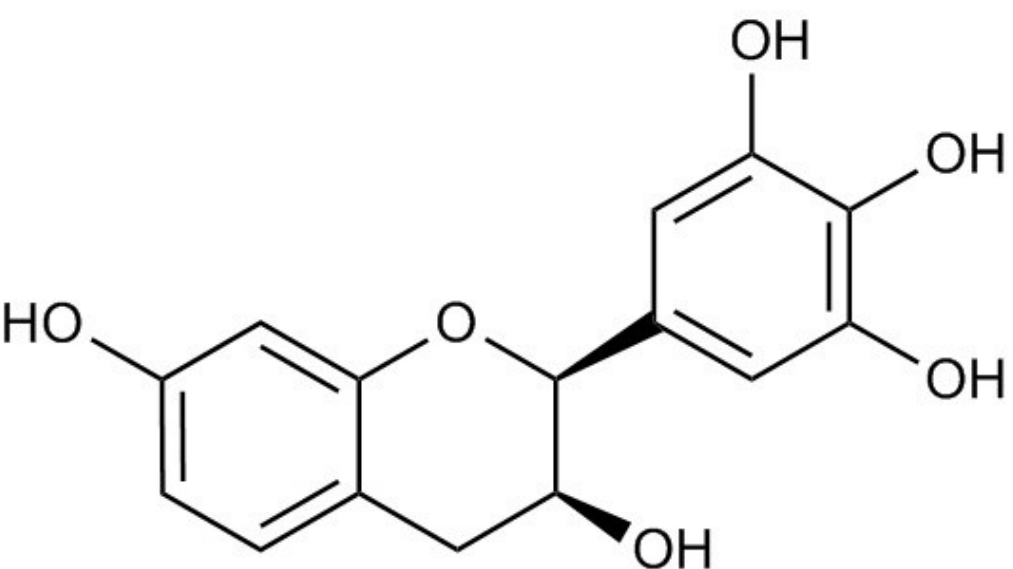

Epigallocatechin

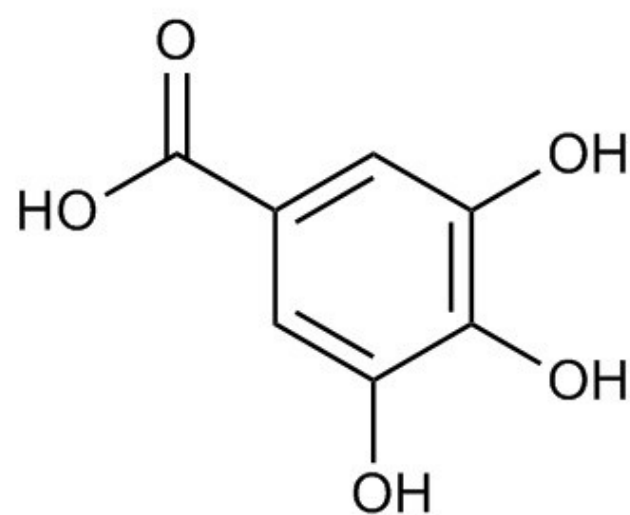

Gallic Acid

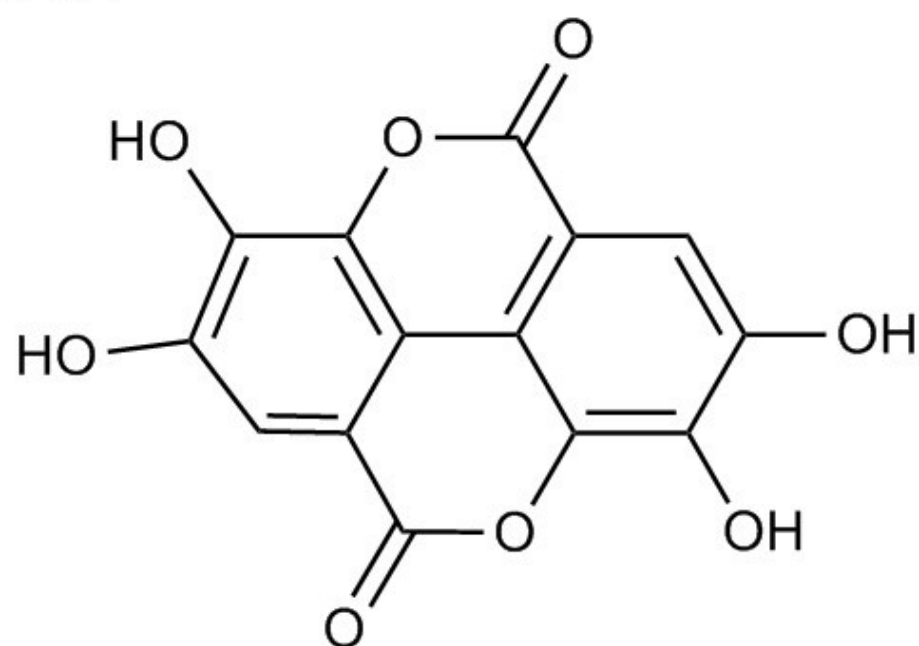

Ellagic Acid

Supplement: d0cp02459g1.pdf [file d0cp02459g1.pdf]
